# Supplementary material
Source: PubMed Central journal article supplement (PMC5621966)

1  
2  
3 Causes and Consequences of Gestational Diabetes in South Asians living in Canada.  
4

5 Short Title: Gestational Diabetes in South Asians  
6  
7

8 Sonia S. Anand, MD, McMaster University, 1280 Main Street West, Hamilton, ON, Canada,  
9 L8S 4K1; Population Health Research Institute and Hamilton Health Sciences 237 Barton Street  
10 East, Hamilton Ontario, Canada;  
11

12  
13  
14 Milan Gupta, MD, Canadian Cardiovascular Research Network, 3 Conestoga Drive, Brampton,  
15 ON L6Z 4N5  
16

17  
18 Koon K Teo, MBBCh, Department of Medicine, McMaster University, 1280 Main Street West,  
19 Hamilton, ON, Canada, L8S 4K1; Population Health Research Institute, Hamilton Health  
20 Sciences 237 Barton Street East, Hamilton Ontario, Canada;  
21

22  
23  
24 Karleen M. Schulze, MMath, Population Health Research Institute, 237 Barton Street East,  
25 Hamilton Ontario, Canada, L8L 2X2;  
26

27  
28  
29 Dipika Desai MSc, Population Health Research Institute, 237 Barton Street East, Hamilton  
30 Ontario, Canada, L8L 2X2;  
31

32  
33  
34 Nora Abdalla, MBBCh, Population Health Research Institute, 237 Barton Street East, Hamilton  
35 Ontario, Canada, L8L 2X2;  
36

37  
38 Michael Zulyniak, PhD, McMaster University, 1280 Main Street West, Hamilton, ON, Canada,  
39 L8S 4K1;  
40

41  
42  
43 Russell de Souza, BA, McMaster University, 1280 Main Street West, Hamilton, ON, Canada,  
44 L8S 4K1;  
45

46  
47 Gita Wahi, MD, McMaster University, 1280 Main Street West, Hamilton, ON, Canada, L8S  
48 4K1;  
49

50  
51  
52 Mateen Shaikh, PhD, McMaster University, 1280 Main Street West, Hamilton, ON, Canada,  
53 L8S 4K1;  
54

55  
56 Joseph Beyene, PhD, McMaster University, 1280 Main Street West, Hamilton, ON, Canada, L8S  
57 4K1;  
58  
59  
60

1  
2  
3  
4  
5 Eileen de Villa, MD, Region of Peel (Public Health), 7120 Hurontario St. Mississauga, Ontario,  
6 Canada, L5W 2C2;  
7

8  
9 Katherine Morrison, MD, McMaster University, 1280 Main Street West, Hamilton, ON, Canada,  
10 L8S 4K1;  
11

12  
13 Sarah D. McDonald, MD, McMaster University, 1280 Main Street West, Hamilton, ON, Canada,  
14 L8S 4K1;  
15  
16

17  
18 Hertzell Gerstein, MD, McMaster University, 1280 Main Street West, Hamilton, ON, Canada,  
19 L8S 4K1;  
20

21 on behalf of the START- Canada Investigators  
22  
23

24  
25  
26 Address for Correspondence:  
27

28 Sonia Anand  
29

30 McMaster University  
31

32 Population Health Research Institute  
33

34 1280 Main St. West, MDCL 3204  
35  
36

37 Hamilton, ON  
38

39 L8S 4K1  
40  
41

42 Fax: 905-528-2814  
43

44 Tel: 905-525-9140 ext. 21523  
45  
46

47 Email: [anands@mcmaster.ca](mailto:anands@mcmaster.ca)  
48  
49

50  
51  
52 Key Words: Gestational diabetes, South Asian, Pregnancy, Body Fat  
53

54 Word Count: 2672, Abstract Word Count: 243, Tables: 4, Figures: 1  
55  
56  
57  
58  
59  
60

1  
2  
3 Abstract:

4  
5 **Background:** Gestational diabetes (GDM) increases the risk of type 2 diabetes in the mother and  
6  
7 offspring. We sought to understand the determinants of GDM, and its impact on newborn health  
8  
9 in a birth cohort of South Asian women and their offspring.  
10  
11

12  
13  
14  
15 **Methods:** We recruited 1,012 women with singleton pregnancies in the second trimester of  
16  
17 pregnancy and collected health information, physical measurements, and an oral glucose  
18  
19 tolerance test. Birth weight, skinfold thickness, and cord blood glucose and insulin were  
20  
21 obtained from newborns.  
22  
23

24  
25  
26  
27 **Results:** The incidence of GDM was 36.3% (95% CI: 33.3-39.3%). Factors associated with  
28  
29 increased GDM included maternal age (odds ratio (OR): 1.08; 95% CI: 1.04-1.12; P<0.0001),  
30  
31 family history of diabetes (OR: 1.65; 95% CI: 1.26-2.17, P=0.0003), pre-pregnancy weight  
32  
33 (OR: 1.025; 95% CI: 1.01-1.04; P<0.0001), and low quality diet (OR: 1.57; 95% CI: 1.16-2.12;  
34  
35 P=0.003). Maternal height was associated with lower GDM (OR: 0.97; 95% CI: 0.95-0.99;  
36  
37 P<0.01). The population attributable risk (PAR) of modifiable GDM risk factors pre-pregnancy  
38  
39 BMI and low quality diet was 37.3%. Newborns of GDM mothers had a significantly higher  
40  
41 birth weight (3267 (SE: 23) vs 3181 (SE:17) grams; P=0.005), higher skinfold thickness (11.7  
42  
43 (SE:0.1) vs 11.2 (SE:0.1); P=0.007, and lower insulin sensitivity (6.42 (SE:0.60) vs 8.96  
44  
45 (SE:0.45) mmol/cIU; P<0.001) compared to non-GDM newborns.  
46  
47  
48  
49  
50

51  
52  
53 **Interpretation:** GDM impacts one-third of pregnancies among South Asian women in  
54  
55 Canada. Pre-pregnancy weight and low quality diet account for 37% of the PAR of GDM.  
56  
57  
58  
59  
60

1  
2  
3 Newborns of GDM mothers have increased birthweight, increased body fat and lower insulin  
4  
5 sensitivity.  
6  
7  
8  
9  
10

### 11 12 13 14 **Introduction:**

15  
16 Gestational diabetes (GDM) is increasing world-wide and increases the risk of large for  
17  
18 gestational age newborns, delivery complications, and of future type 2 diabetes among both  
19  
20 mother and offspring (1-4). South Asian migrants to high income countries including the United  
21  
22 Kingdom (UK), United States and Canada have an excess prevalence of abdominal obesity and  
23  
24 type 2 diabetes (5–10), and a 2 fold increased risk of GDM when compared to white Caucasians.  
25  
26 (11–14) The reasons for South Asians' increased propensity to develop GDM are not well  
27  
28 characterized. Prior analyses of multiethnic cohorts identified advanced maternal age, family  
29  
30 history of diabetes, non-white ethnicity, maternal overweight or obesity and cigarette smoking as  
31  
32 common predictors of GDM (15–17). Among South Asian women living in India increasing age,  
33  
34 low adult height, urban living, a family history of diabetes, parity of three or more children, and  
35  
36 low maternal vitamin B12 (18–20) are associated with the increased GDM prevalence. In high  
37  
38 income countries, South Asian women make up an increasing proportion of the population, and  
39  
40 are recognized to have a higher risk of GDM, yet specific prevention strategies for this high risk  
41  
42 ethnic group are lacking (21–24).  
43  
44  
45  
46  
47  
48

49  
50 In this prospective birth cohort study conducted among women of South Asian origin living in  
51  
52 Canada, we sought to: 1) determine the maternal factors associated with GDM, and 2) determine  
53  
54 the impact of GDM on newborn anthropometric characteristics including birth weight, body fat,  
55  
56 and insulin sensitivity.  
57  
58  
59  
60

**Methods:**

*Design:* The South Asian birth cohort (START) is a prospective birth cohort study in Canada (25). South Asian women with singleton pregnancies were recruited during the second trimester of pregnancy from the communities of Brampton and Mississauga, Ontario. Research Ethics Board approval was received on March 3, 2011 and all participants provided written informed consent. Participants were recruited by referral from primary care physicians and obstetric specialists in Peel Region, Ontario, Canada between July 11, 2011 and November 10, 2015.

*Maternal Measurements:* During the second trimester, participants who did not have pre-existing diabetes completed a 75 gram oral glucose tolerance test (OGTT). GDM was classified using the new cut-off values derived from the Born in Bradford (BiB) cohort of South Asian women defined as a fasting glucose  $\geq$  of 5.2 mmol/L or a 2 h post-load level of  $\geq$  7.2 mmol/L. These cut-offs were recently shown to be associated with a high infant birth weight [ $>90$ th percentile for gestational age] and adiposity [sum of skinfolds  $>90$ th percentile for gestational age] in 5,408 babies born to South Asian mothers living in the UK (26). All START participants completed detailed health questionnaires including self-reported personal medical and family history, social and cultural questions, and a previously validated ethnic-specific food frequency questionnaires (FFQ) (27). Using the FFQ data, we derived a score to assess maternal diet quality using the following algorithm: 1 point was given if they consumed more than the study population median for (a) green vegetables, (b) raw vegetables, (c) cooked vegetables and (d) fruits; or less than the study population median for (e) fried foods and (f) meat. The score ranged from zero to six; diet

1  
2  
3 quality was classified as low (zero-one), intermediate (two-three), or high (four-six) (28). Social  
4  
5 disadvantage was determined using a previously validated index which includes employment,  
6  
7 marital status and income. (29) A standardized protocol was used to measure maternal resting  
8  
9 blood pressure using an oscillometric device (OMRON), body weight, height, hip circumference  
10  
11 and skinfold thickness. Maternal body fat was estimated by adding the skinfold thickness from  
12  
13 triceps and subscapular sites (30). Participants self-reported their pre-pregnancy weight, and  
14  
15 gestational weight gain was calculated by subtracting the pre-pregnancy weight from the end  
16  
17 pregnancy weight immediately prior to delivery, and expressed both as absolute and percent  
18  
19 weight gained from the pre-pregnancy weight. Insulin and metformin use during pregnancy was  
20  
21 captured either from the self-reported questionnaire at baseline or from a post-partum chart  
22  
23 review. Family history was defined mother or father having a history of type 2 diabetes.  
24  
25  
26  
27  
28  
29  
30  
31

32 *Delivery Information and Newborn Measurements:* Type, duration and outcomes of labour were  
33  
34 obtained from hospital charts by trained research assistants using a standardized protocol.  
35  
36 Placental weight was determined by reducing the untrimmed complete placenta weight, as  
37  
38 measured by the delivery nurse, to a trimmed weight (31). Birthweight was taken from the  
39  
40 hospital chart. Newborns born 37 weeks or greater were classified as large for gestational age  
41  
42 (LGA) or small for gestational age (SGA) by gestational age and sex specific cutpoints of  $\geq 90^{\text{th}}$   
43  
44 and  $< 10^{\text{th}}$  respectively (32). Additional measurements of newborns were completed by trained  
45  
46 research assistants using a standardized protocol. Specifically, newborn length was collected  
47  
48 using the O'LEARY length board. Head circumference was measured using a non-stretchable  
49  
50 measuring tape. Waist and hip circumferences were measured using an OHAUS non-stretchable  
51  
52 tape with an attached spring balance. Sum of skinfold thickness includes measurements from  
53  
54  
55  
56  
57  
58  
59  
60

1  
2  
3 triceps and subscapular sites. Skinfold thickness were taken in triplicate and recorded to the  
4 nearest mm using the HOLTAIN calipers (0.2 mm). The intraclass correlation (reliability) of the  
5  
6  
7  
8  
9  
10  
11  
12  
13  
14  
15  
16  
17  
18  
19  
20  
21  
22  
23  
24  
25  
26  
27  
28  
29  
30  
31  
32  
33  
34  
35  
36  
37  
38  
39  
40  
41  
42  
43  
44  
45  
46  
47  
48  
49  
50  
51  
52  
53  
54  
55  
56  
57  
58  
59  
60

triceps and subscapular sites. Skinfold thickness were taken in triplicate and recorded to the nearest mm using the HOLTAIN calipers (0.2 mm). The intraclass correlation (reliability) of the skinfold measurements was calculated and was 0.98 for subscapular skin folds and 0.96 for triceps skinfolds overall (33). Ponderal index (a measure of neonatal leanness) was calculated as birthweight/length<sup>3</sup> (32). These measures were taken within 24 hours in 81.0% percent of newborns and between 24 and 96 hours after delivery in 7.6%. If no measurements were taken before 96 hours, the chart recording of measure was used, if available.

*Biospecimens:* A cord blood sample from the umbilical vein was taken at birth and was collected in 777/1002 (77.3%) percent of babies using a standardized protocol. Within two hours of collection specimens were centrifuged and sample aliquots frozen at -70 degrees Celsius and shipped for storage in liquid nitrogen at the Clinical Research Laboratory and BioBank, Hamilton Health Sciences. All suitable samples were analyzed for glucose and insulin. Glucose was measured using the Becton Dickenson Unicell DxC 600 Synchron Clinical System using a timed endpoint method to determine glucose. Insulin was measured with Roche Elecsys® 2010 immunoassay analyzer using an electrochemiluminescence immunoassay. The coefficient of variation (CV) for glucose and insulin were 24.4% and 84.6% respectively.

*Statistical Considerations:* Statistical analyses were performed using SAS, version 9.4 (SAS Institute, Cary, NC, USA). Means (SD) and counts (%) were calculated to summarize continuous variables and categorical data respectively. Means (SE) were calculated for adjusted continuous results. The incidence of GDM was directly age-standardized to the general Canadian population using the 2011 Census population for women aged 20-44 years as the standard population (34).

1  
2  
3 The univariate associations between maternal factors and GDM were assessed using chi-square  
4 tests for categorical variables and t-tests for continuous variables as appropriate. Factors with a  
5 univariate p-value of  $> 0.10$  were then considered for a multivariable logistic regression model;  
6  
7  
8 for any set of factors which were highly correlated, only one was included. Stepwise selection  
9  
10 methods were used to determine the final model. The univariate associations between newborn  
11  
12 anthropometric and maternal GDM were assessed using ANCOVA, adjusting for newborn  
13  
14 gestational age, sex, and maternal insulin use during pregnancy. Population attributable risk  
15  
16 (PAR) estimates and 95% CIs were calculated by the interactive risk-attributable program  
17  
18 software (US National Cancer Institute, 2002). (35) The PAR is calculated by considering the  
19  
20 frequency of the exposure in the population and the relationship of the risk factor to disease, and  
21  
22 quantifies the proportion of GDM that can be prevented if a specific risk or exposure is  
23  
24 eliminated from the study population while holding other risks constant.  
25  
26  
27  
28  
29  
30  
31  
32  
33  
34  
35

### 36 *Results:*

37  
38 The mean time of gestation that the OGTT was performed was 26.5 weeks (SD=1.6). Of the  
39  
40 1,012 women with singleton pregnancies enrolled in the study, four with a history of diabetes  
41  
42 and two who withdrew early, were excluded from this analysis. In the remaining 1006, GDM  
43  
44 status was classified in 945 using their OGTT results and the remaining 61 as reported on the  
45  
46 birth chart. In these 1,006 mothers, birthweight, gestational age and sex information was  
47  
48 available for 989 newborns. (sFigure1)  
49  
50  
51  
52  
53  
54  
55  
56  
57  
58  
59  
60



1  
2  
3  
4  
5  
6  
7  
8  
9  
10  
*Gestational diabetes:* Overall 36.3% (365/1006) (95% CI: 33.3-39.3%) of women were classified with GDM using the Bib criteria which is 40.7% when age-standardized in 20-44 year old women living in Canada.

11  
12  
13  
14  
15  
16  
17  
18  
19  
20  
21  
22  
23  
24  
25  
26  
27  
28  
29  
30  
31  
32  
33  
*Baseline characteristics of women with and without GDM:* Women with GDM were older age (31.2 vs 29.7 years,  $P < 0.0001$ ), more likely to have a family history of diabetes (52.5% vs 35.7%,  $P < 0.0001$ ), multiparous (65.7 % vs 54.8%;  $P < 0.001$ ), have higher pre-pregnancy weight (64.9 (12.2) vs 61.3 (11.8) kg,  $P < 0.0001$ ), lower maternal height (161.6 (6.2) vs 162.5 (6.3) cm,  $P = 0.02$ ), higher pre-pregnancy BMI (24.9 (4.6) vs 23.2 (4.3)  $\text{kg/m}^3$ ,  $P < 0.0001$ ), body fat (sum of skin fold thickness: 52.3 (12.3) vs 47.9 (12.4) mm;  $P = 0.0001$ ), and were more likely to consume a low quality diet characterized by about half as many vegetables and twice as many meat and fried food servings daily (33.4% vs 22.9%,  $P < 0.001$ ) compared to women without GDM. Vegetarianism self-reported physical activity in pregnancy, and socioeconomic status were not different between the groups. (Table 1)

34  
35  
36  
37  
38  
39  
40  
41  
42  
43  
44  
45  
46  
47  
48  
49  
50  
51  
52  
53  
54  
55  
56  
57  
58  
59  
60  
*Multivariable predictors of GDM:* Factors that were independently associated with an increased risk of GDM included maternal age, (per 1 year increase; OR = 1.08 (1.04-1.12),  $P < 0.0001$ ), family history of DM: (OR: 1.65 (1.26-2.17);  $P = 0.0003$ ); pre-pregnancy weight (per 1 kg increase) (OR: 1.025; (1.01-1.04),  $P < 0.0001$ ); and low diet quality (OR: 1.57; (1.16-2.12);  $P = 0.003$ ), and the only protective factor identified was maternal height (per 1 cm increase); (OR: 0.97 (0.95-0.99)  $P = 0.007$ ). The prevalence and odds ratios of these independent factors were used to calculate the PAR. All factors measured in our study accounted for 65.3% (95% CI: 55.6 – 75.1) of the GDM, and the modifiable risk factors of low quality diet and pre-pregnancy BMI > 23 accounted for 37.3% of PAR (95% CI: 25.9, 48.7). (Figure 1)

1  
2  
3 *Newborn anthropometrics:* 5·8% of newborns were delivered before 37 weeks (pre-term). The  
4  
5 mean birthweight was 3,211 grams (95%CI: 3181-3242). Newborns of mothers classified as  
6  
7 having GDM had higher birthweight 3267 (SE:23) vs 3181 (SE:17) g, P=0·005); and ponderal  
8  
9 index (24·8 (SE:0·2) vs 24·0 (SE:0·1), P=0·002), and an increased skinfold thickness (11·7  
10  
11 (SE:0·1) vs 11·2 (SE:0·1); P=0·007) compared to those without GDM, adjusting for newborn  
12  
13 gestational age, sex and mothers use of insulin. (Table 2) Comparing newborns from GDM  
14  
15 mothers to those without GDM, a higher percentage of newborns were classified as LGA (13·8%  
16  
17 vs 9·0%, P=0·02), and the placental weight was higher in (500·6 (SE: 8·1) vs 475·1 (SE: 5·8),  
18  
19 P=0·007). Notably women with GDM were more likely to undergo C-Section delivery compared  
20  
21 to those without GDM (35·2% vs 27·9%, P=0·02). In addition, although no difference in  
22  
23 newborn cord blood glucose was observed (4·1 (SE: 0·1) vs 4·1 (SE: 0·0) mmol/L), insulin (log)  
24  
25 was increased 76·3 (SE:3·8) vs 61·6 (SE:2·8) pmol/L, p<0·002), and the glucose/insulin ratio, a  
26  
27 marker of insulin sensitivity was significantly lower (6·42 (0·6) vs 8·96 (0·45) mmol/cIU;  
28  
29 p<0·001) signifying reduced insulin sensitivity in the offspring of GDM mothers. (Table 2)  
30  
31  
32  
33  
34  
35  
36  
37  
38

### 39 **Interpretation:**

40  
41 South Asians living in high income countries like Canada have a high burden of GDM affecting  
42  
43 upwards of one-third of the population. The major determinants of GDM accounted for 65·3% of  
44  
45 the PAR of GDM, and included non-modifiable factors such as age, family history of type 2  
46  
47 diabetes, and maternal height, as well as modifiable factors such as pre-pregnancy weight, and  
48  
49 low diet quality. Furthermore newborns of dysglycemic mothers had increased birthweight, body  
50  
51 fat, and reduced insulin sensitivity which may be implicated in their future risk of excess  
52  
53 adiposity and type 2 diabetes.  
54  
55  
56  
57  
58  
59  
60

1  
2  
3  
4  
5  
6 In an ethnic population with such high rates of gestational dysglycemia, modifiable risk factors  
7  
8 for GDM are important to identify in order to design intervention studies aimed at preventing  
9  
10 GDM. The PAR the modifiable risk factors for GDM including low quality diet and pre-  
11  
12 pregnancy BMI alone was 37.3%. This suggests that if South Asian women could achieve an  
13  
14 optimal pre-pregnancy weight i.e. BMI < 23, and improve their diet quality, approximately one-  
15  
16 third of GDM in South Asian women living in high income countries could be prevented.  
17  
18  
19  
20

21  
22 We observed that pre-pregnancy BMI was a significant predictor of GDM. Furthermore, a BMI  
23  
24 of 23-25 is often classified as “normal pre-pregnancy weight” in white Caucasian women yet  
25  
26 likely represents “overweight and excess adiposity” in South Asian women (36,37). Women who  
27  
28 developed GDM had a higher pre-pregnancy weight by three kg, were shorter by one cm, and  
29  
30 had significantly greater body fat as represented by their higher skinfold thickness. In our  
31  
32 multivariate regression pre-pregnancy BMI was the dominant predictor of GDM more so than  
33  
34 gestational weight gain, which as expected, was 1 kg lower in GDM mothers, than among those  
35  
36 without GDM. This highlights the importance of public health messaging to South Asian women  
37  
38 who are contemplating pregnancy to aim for an optimal pre-pregnancy weight *before* pregnancy  
39  
40 as a prevention strategy against GDM. Our data would suggest that in Canada if South Asian  
41  
42 women who become pregnant have a BMI < 23, 28% of GDM observed in the population would  
43  
44 be avoided. To our knowledge such messaging is not routinely provided by primary care  
45  
46 physicians or public health specialists.  
47  
48  
49  
50  
51

52  
53 The low quality diet in START was characterized by higher consumption of meat (red, chicken,  
54  
55 and processed), rice, fried foods, and was lower in raw or cooked vegetables, whereas a high  
56  
57  
58  
59  
60

1  
2  
3 quality diet was associated with higher consumption of vegetables, legumes, and whole grain  
4 breads. (Table 4) It would be reasonable to presume that a modified South Asian diet which  
5 replaced fried foods and meat with more vegetable protein, and raw and cooked vegetables, and  
6 replaced refined grains with whole grains, may reduce GDM in this population by 12%. A prior  
7  
8  
9  
10  
11  
12  
13  
14  
15  
16  
17  
18  
19  
20  
21  
22  
23  
24  
25  
26  
27  
28  
29  
30  
31  
32  
33  
34  
35  
36  
37  
38  
39  
40  
41  
42  
43  
44  
45  
46  
47  
48  
49  
50  
51  
52  
53  
54  
55  
56  
57  
58  
59  
60

quality diet was associated with higher consumption of vegetables, legumes, and whole grain breads. (Table 4) It would be reasonable to presume that a modified South Asian diet which replaced fried foods and meat with more vegetable protein, and raw and cooked vegetables, and replaced refined grains with whole grains, may reduce GDM in this population by 12%. A prior Cochrane review suggested that diet interventions are more effective than either exercise alone or mixed interventions in preventing GDM (38). We identified no randomized trials which aimed to reduce pre-pregnancy BMI or alter diet quality in pregnancy as a method to prevent GDM in South Asian women living in high income countries. Such interventions should be developed and tested.

Our observation that a family history of type 2 diabetes is a strong risk factor for GDM is consistent with prior studies. This association likely represents a crude marker of a women's genetic risk of type 2 diabetes indicating that women who develop GDM may carry a greater genetic load of variants associated with beta cell dysfunction and insulin resistance, which in turn increases her offspring's genetic load for these conditions (39,40). We also observed that maternal hyperglycemia is associated with increased newborn birthweight, more LGA, more adipose tissue, and greater placental size. Furthermore offspring of mothers with GDM are larger and have reduced insulin sensitivity. Chronic exposure of the growing fetus to hyperglycemia leads to oxidative stress and inflammation, which may in turn induce changes in the regulation of gene expression resulting in reduced insulin secretion or action (41). Future studies are needed which characterize the genetic load and DNA expression/methylation patterns associated with fetal hyperglycemia and relate these profiles to birth and early childhood metabolic profile.

1  
2  
3 Our study has a number of strengths being a large prospective birth cohort with direct  
4 measurement of glycemic status using the 75 gram OGTT with direct measurement of adiposity  
5 of mother and newborn. Limitations of our analyses include the fact that our cohort was not a  
6 random sample of the population which may overestimate the burden of dysglycemia, although  
7 we recruited participants from primary care settings and those attending specialist obstetrical  
8 clinics. The lack of random sampling does not affect our association analyses, which remain  
9 internally valid. Women's knowledge of a GDM diagnosis leading to change in modifiable  
10 factors (such as diet) likely had minimal to no impact on our findings of low diet quality as a  
11 predictor of GDM, as only 9.5% (96/1006) of women knew their GDM status when completing  
12 the dietary questionnaire.  
13  
14  
15  
16  
17  
18  
19  
20  
21  
22  
23  
24  
25  
26  
27

28 **Conclusion:** GDM affects up to one-third of South Asian women living in Canada. Modifiable  
29 risk factors for GDM include pre-pregnancy weight and low quality diet. Newborns exposed to  
30 the highest maternal gestational glucose, have increased birthweight, increased body fat and  
31 lower insulin sensitivity, the long-term consequences of which require ongoing prospective  
32 follow-up.  
33  
34  
35  
36  
37  
38  
39  
40  
41  
42  
43  
44  
45

46 Author contributions:

47  
48 SSA, MG, KKT, HG, and KMS had, substantial contributions to the interpretation of data for the  
49 work; revising the work critically for important intellectual content; final approval of the version  
50 to be published; and agreement to be accountable for all aspects of the work in ensuring that  
51 questions related to the accuracy or integrity of any part of the work are appropriately  
52  
53  
54  
55  
56  
57  
58  
59  
60

1  
2  
3 investigated and resolved. DD, MZ, RdS, GW, MS, JB, NA, EdV had substantial contributions  
4  
5 to the interpretation of data for the work; revising the work critically for important intellectual  
6  
7 content; final approval of the version to be published and KM had revising the work critically for  
8  
9 important intellectual content; final approval of the version to be published.  
10  
11

12  
13  
14  
15  
16  
17 Acknowledgments:

18  
19  
20 CIHR/ICMR: START data was collected as part of a bilateral ICMR /CIHR funded program  
21  
22 INC-109205. Heart and Stroke Foundation of Canada grant: NA7283. Dr. Anand is supported by  
23  
24 Canada Research Chair Tier 1 in Ethnic Diversity and Cardiovascular Disease, and a Heart  
25  
26 and Stroke Foundation/Michael G. DeGroot Chair in Population Health Research at  
27  
28 McMaster University, Canada. SDM is supported by a Tier II Canada Research Chair. Hertzl  
29  
30 Gerstein is supported by McMaster–Aventis Population Health Institute Chair in Diabetes  
31  
32 Research.  
33  
34  
35  
36  
37  
38

39 There are no relevant conflicts of interest to disclose.  
40  
41  
42  
43  
44  
45  
46  
47  
48  
49  
50  
51  
52  
53  
54  
55  
56  
57  
58  
59  
60

## References:

1. HAPO Study Cooperative Research Group, Metzger BE, Lowe LP, et al. Hyperglycemia and Adverse Pregnancy Outcomes. *N Engl J Med* [Internet]. 2008 May 8 [cited 2016 Oct 12];358(19):1991–2002. Available from: <http://www.ncbi.nlm.nih.gov/pubmed/18463375>
2. Vohr BR, Boney CM. Gestational diabetes: the forerunner for the development of maternal and childhood obesity and metabolic syndrome? *J Matern neonatal Med* [Internet]. Taylor & Francis; 2008 Jan 7 [cited 2016 Aug 11];21(3):149–57. Available from: <http://www.tandfonline.com/doi/full/10.1080/14767050801929430>
3. Aceti A, Santhakumaran S, Logan KM, Phillipps LH, Prior E, Gale C, Hyde MJ, Modi N. The diabetic pregnancy and offspring blood pressure in childhood: a systematic review and meta-analysis. *Diabetologia* [Internet]. 2012 Nov 5 [cited 2016 Oct 13];55(11):3114–27. Available from: <http://www.ncbi.nlm.nih.gov/pubmed/22948491>
4. Kim SY, England JL, Sharma JA, Njoroge T. Gestational diabetes mellitus and risk of childhood overweight and obesity in offspring: a systematic review. *Exp Diabetes Res* [Internet]. Hindawi Publishing Corporation; 2011 [cited 2016 Oct 12];2011:541308. Available from: <http://www.ncbi.nlm.nih.gov/pubmed/21960991>
5. Sattar N, Gill JMR. Type 2 diabetes in migrant south Asians: mechanisms, mitigation, and management. *Lancet Diabetes Endocrinol* [Internet]. Elsevier; 2015 Dec [cited 2016 Oct 13];3(12):1004–16. Available from: <http://linkinghub.elsevier.com/retrieve/pii/S2213858715003265>
6. Abate N, Chandalia M. Ethnicity and type 2 diabetes: focus on Asian Indians. *J Diabetes Complicat* [Internet]. 2001 [cited 2016 Oct 13];15(6):320–7. Available from:

- 1  
2  
3 <http://www.ncbi.nlm.nih.gov/pubmed/11711326>  
4  
5  
6 7. McKeigue PM, Shah B, Marmot MG. Relation of central obesity and insulin resistance  
7  
8 with high diabetes prevalence and cardiovascular risk in South Asians. *Lancet* (London,  
9  
10 England) [Internet]. 1991 Feb 16 [cited 2016 Oct 13];337(8738):382–6. Available from:  
11  
12 <http://www.ncbi.nlm.nih.gov/pubmed/1671422>  
13  
14  
15 8. Anand SS, Yusuf S, Vuksan V, Devanese S, Teo KK, Montague PA, Kelemen L, Yi C,  
16  
17 Lonn E, Gerstein H, Hegele RA, McQueen M. Differences in risk factors, atherosclerosis,  
18  
19 and cardiovascular disease between ethnic groups in Canada: the Study of Health  
20  
21 Assessment and Risk in Ethnic groups (SHARE). *Lancet* (London, England) [Internet].  
22  
23 2000 Jul 22 [cited 2016 Oct 12];356(9226):279–84. Available from:  
24  
25 <http://www.ncbi.nlm.nih.gov/pubmed/11071182>  
26  
27  
28  
29 9. Rana A, de Souza RJ, Kandasamy S, Lear SA, Anand SS. Cardiovascular risk among  
30  
31 South Asians living in Canada: a systematic review and meta-analysis. *C open* [Internet].  
32  
33 Canadian Medical Association; 2014 Jul [cited 2016 Oct 13];2(3):E183-91. Available  
34  
35 from: <http://www.ncbi.nlm.nih.gov/pubmed/25295238>  
36  
37  
38  
39 10. Mohanty SA, Woolhandler S, Himmelstein DU, Bor DH. Diabetes and cardiovascular  
40  
41 disease among asian indians in the united states. *J Gen Intern Med* [Internet]. Springer-  
42  
43 Verlag; 2005 May [cited 2016 Oct 13];20(5):474–8. Available from:  
44  
45 <http://link.springer.com/10.1111/j.1525-1497.2005.40294.x>  
46  
47  
48  
49 11. Mukerji G, Chiu M, Shah BR. Gestational diabetes mellitus and pregnancy outcomes  
50  
51 among Chinese and South Asian women in Canada. *J Matern Fetal Neonatal Med*  
52  
53 [Internet]. 2013 Feb [cited 2016 Jan 21];26(3):279–84. Available from:  
54  
55 <http://www.ncbi.nlm.nih.gov/pubmed/23039093>  
56  
57  
58  
59  
60



- 1  
2  
3  
4  
5  
6  
7  
8  
9  
10  
11  
12  
13  
14  
15  
16  
17  
18  
19  
20  
21  
22  
23  
24  
25  
26  
27  
28  
29  
30  
31  
32  
33  
34  
35  
36  
37  
38  
39  
40  
41  
42  
43  
44  
45  
46  
47  
48  
49  
50  
51  
52  
53  
54  
55  
56  
57  
58  
59  
60
12. Jenum AK, Mørkrid K, Sletner L, Vangen S, Torper JL, Nakstad B, Voldner N, Rognerud-Jensen OH, Bernsten S, Mosdol A, Skriverhaug T, Vardal MH, Holme I, Yajnik CS, Birkeland KI. Impact of ethnicity on gestational diabetes identified with the WHO and the modified International Association of Diabetes and Pregnancy Study Groups criteria: a population-based cohort study. *Eur J Endocrinol* [Internet]. 2012 Feb [cited 2016 Jan 21];166(2):317–24. Available from: <http://www.pubmedcentral.nih.gov/articlerender.fcgi?artid=3260695&tool=pmcentrez&rendertype=abstract>
  13. Urquia M, Glazier RH, Berger H, Ying I, De Souza L, Ray JG. Gestational diabetes among immigrant women. *Epidemiology* [Internet]. 2011 Nov [cited 2016 Oct 12];22(6):879–80. Available from: <http://www.ncbi.nlm.nih.gov/pubmed/21968784>
  14. Savitz DA, Janevic TM, Engel SM, Kaufman JS, Herring AH. Ethnicity and gestational diabetes in New York City, 1995-2003. *BJOG* [Internet]. 2008 Jul [cited 2016 Oct 13];115(8):969–78. Available from: <http://www.ncbi.nlm.nih.gov/pubmed/18651880>
  15. Solomon C, Willett W, Carey V, Rich-Edwards J, Hunter DJ, Colditz GA, Stampfer MJ, Speizer FE, Spiegelman D, Manson JE. A prospective study of pregravid determinants of gestational diabetes mellitus. *JAMA* [Internet]. 1997 Oct 1;278(13):1078–83. Available from: <http://dx.doi.org/10.1001/jama.1997.03550130052036>
  16. Berkowitz GS, Lapinski RH, Wein R, Lee D. Race/Ethnicity and Other Risk Factors for Gestational Diabetes. *Am J Epidemiol* [Internet]. 1992 May 1;135(9):965–73. Available from: <http://aje.oxfordjournals.org/content/135/9/965.abstract>
  17. Hedderson MM, Darbinian JA, Quesenberry CP, Ferrara A. Pregravid cardiometabolic risk profile and risk for gestational diabetes mellitus. *Am J Obstet Gynecol* [Internet].

- 1  
2  
3 2011 Jul;205(1):55.e1-55.e7. Available from:  
4  
5  
6 <http://www.sciencedirect.com/science/article/pii/S0002937811003759>  
7
- 8 18. Zargar AH, Sheikh MI, Bashir MI, Masoodi SR, Laway BA, Wani AI, Bhat MH, Dar FA.  
9  
10 Prevalence of gestational diabetes mellitus in Kashmiri women from the Indian  
11  
12 subcontinent. *Diabetes Res Clin Pract* [Internet]. 2004 Nov [cited 2016 Oct  
13  
14 11];66(2):139–45. Available from: <http://www.ncbi.nlm.nih.gov/pubmed/15533581>  
15  
16
- 17 19. Arora GP, Thaman RG, Prasad RB, Almgren P, Brons C, Groop LC, Vaag AA.  
18  
19 Prevalence and risk factors of gestational diabetes in Punjab, North India: results from a  
20  
21 population screening program. *Eur J Endocrinol* [Internet]. 2015 Aug [cited 2016 Oct  
22  
23 11];173(2):257–67. Available from: <http://www.ncbi.nlm.nih.gov/pubmed/26012589>  
24  
25  
26
- 27 20. Krishnaveni G V, Hill JC, Veena SR, Bhat DS, Wills AK, Karat CL, Yajnik CS, Fall CH  
28  
29 Low plasma vitamin B12 in pregnancy is associated with gestational “diabesity” and later  
30  
31 diabetes. *Diabetologia* [Internet]. Springer-Verlag; 2009 Nov 26 [cited 2016 Oct  
32  
33 11];52(11):2350–8. Available from: <http://link.springer.com/10.1007/s00125-009-1499-0>  
34  
35  
36
- 37 21. American Diabetes Association. 1. Strategies for Improving Care. *Diabetes Care*  
38  
39 [Internet]. 2015 Dec 22;39(Supplement 1):S6 LP-S12. Available from:  
40  
41 [http://care.diabetesjournals.org/content/39/Supplement\\_1/S6.abstract](http://care.diabetesjournals.org/content/39/Supplement_1/S6.abstract)  
42  
43
- 44 22. Thompson D, Berger H, Feig D, Gagnon R, Kader T, Keely E, Kozak S, Ryan E, Sermer  
45  
46 M, Vinokuroff C. Diabetes and Pregnancy. *Can J Diabetes* [Internet]. Canadian Diabetes  
47  
48 Association; 2013 Apr [cited 2016 Oct 11];37:S168–83. Available from:  
49  
50 <http://linkinghub.elsevier.com/retrieve/pii/S1499267113000452>  
51  
52
- 53 23. Babu GR, Garadi L, Murthy GVS, Kinra S. Effect of hyperglycaemia in pregnancy on  
54  
55 adiposity in their infants in India: a protocol of a multicentre cohort study. *BMJ Open*  
56  
57  
58  
59  
60

- [Internet]. 2014 Jun 27 [cited 2016 Oct 13];4(6):e005417–e005417. Available from: <http://www.ncbi.nlm.nih.gov/pubmed/24972608>
24. West J, Lawlor DA, Fairley L, Wright J. Differences in socioeconomic position, lifestyle and health-related pregnancy characteristics between Pakistani and White British women in the Born in Bradford prospective cohort study: the influence of the woman's, her partner's and their parents' place . *BMJ Open* [Internet]. 2014 Jun 1;4(6). Available from: <http://bmjopen.bmj.com/content/4/6/e004805.abstract>
25. Anand SS, Vasudevan A, Gupta M, Morrison K, Kurpad A, Teo KK, Srinivasan K: START Cohort Study Investigators. Rationale and design of South Asian Birth Cohort (START): a Canada-India collaborative study. *BMC Public Health* [Internet]. BioMed Central; 2013 Dec 28 [cited 2016 Oct 12];13(1):79. Available from: <http://bmcpublikealth.biomedcentral.com/articles/10.1186/1471-2458-13-79>
26. Farrar D, Fairley L, Santorelli G, Tuffnell D, Sheldon TA, Wright j, van Overveld L, Lawlor DA. Association between hyperglycaemia and adverse perinatal outcomes in south Asian and white British women: analysis of data from the Born in Bradford cohort. *Lancet Diabetes Endocrinol* [Internet]. 2015 Oct [cited 2016 Oct 11];3(10):795–804. Available from: <http://linkinghub.elsevier.com/retrieve/pii/S2213858715002557>
27. Kelemen LE, Anand SS, Vuksan V, Yi Q, Teo KK, Devanesen S, Yusuf S: SHARE Investigators. Development and evaluation of cultural food frequency questionnaires for South Asians, Chinese, and Europeans in North America. *J Am Diet Assoc* [Internet]. 2003 Sep [cited 2016 Oct 12];103(9):1178–84. Available from: <http://www.ncbi.nlm.nih.gov/pubmed/12963948>
28. Iqbal R, Anand S, Ounpuu S, Islam S, Zhang X, Rangarajan S, Chifamba J, Al-Hinai A,

- 1  
2  
3 Keltai M, Yusuf S: INTERHEART Investigators. Dietary patterns and the risk of acute  
4 myocardial infarction in 52 countries: results of the INTERHEART study. *Circulation*  
5  
6 [Internet]. 2008 Nov 4 [cited 2016 Oct 12];118(19):1929–37. Available from:  
7  
8  
9  
10 <http://www.ncbi.nlm.nih.gov/pubmed/18936332>  
11
- 12 29. Anand SS, Razak F, Davis AD, Jacobs R, Vuksan V, Teo K, Yusuf S. Social disadvantage  
13 and cardiovascular disease: development of an index and analysis of age, sex, and  
14 ethnicity effects. *Int J Epidemiol* [Internet]. Oxford University Press; 2006 Oct [cited 2016  
15 Oct 12];35(5):1239–45. Available from: <http://www.ncbi.nlm.nih.gov/pubmed/16926215>  
16  
17  
18  
19  
20  
21
- 22 30. Sommer C, Mørkrid K, Jenum AK, Sletner L, Mosdøl A, Birkeland KI. Weight gain, total  
23 fat gain and regional fat gain during pregnancy and the association with gestational  
24 diabetes: a population-based cohort study. *Int J Obes* [Internet]. Nature Publishing Group;  
25 2014 Jan 20 [cited 2016 Oct 12];38(1):76–81. Available from:  
26  
27  
28  
29  
30  
31  
32 <http://www.nature.com/doi/10.1038/ijo.2013.185>  
33
- 34 31. Leary SD, Godfrey KM, Greenaway LJ, Davill VA, Fall CHD. Contribution of the  
35 umbilical cord and membranes to untrimmed placental weight. *Placenta* [Internet]. 2003  
36 [cited 2016 Oct 12];24(2–3):276–8. Available from:  
37  
38  
39  
40  
41  
42 <http://www.ncbi.nlm.nih.gov/pubmed/12566255>  
43
- 44 32. Yajnik CS, Fall CHD, Coyaji KJ, Hirve SS, Rao S, Barker DJ, Joglekar C, Kellingray S.  
45 Neonatal anthropometry: the thin–fat Indian baby. The Pune Maternal Nutrition Study. *Int*  
46  
47  
48  
49  
50  
51  
52 *J Obes Relat Metab Disord* [Internet]. 2003 Feb [cited 2016 Oct 13];27(2):173–80.  
53 Available from: <http://www.ncbi.nlm.nih.gov/pubmed/12586996>  
54
- 55 33. Winer B. *Statistical Principles in Experimental Design*. 2nd ed. London, UK: McGraw-  
56 Hill Kogakusha, Ltd.; 1971.  
57  
58  
59  
60

- 1  
2  
3  
4  
5  
6  
7  
8  
9  
10  
11  
12  
13  
14  
15  
16  
17  
18  
19  
20  
21  
22  
23  
24  
25  
26  
27  
28  
29  
30  
31  
32  
33  
34  
35  
36  
37  
38  
39  
40  
41  
42  
43  
44  
45  
46  
47  
48  
49  
50  
51  
52  
53  
54  
55  
56  
57  
58  
59  
60
34. Statistics Canada. 2011 Census of Canada: Topic-based tabulations. Age (131) and Sex (3) for the Population of Canada, Provinces, Territories, Census Divisions, Census Subdivisions and Dissemination Areas, 2011 Census. Cat number 98-311-XCB2011018 [Internet]. 2012; Available from: <http://www12.statcan.gc.ca/census-recensement/2011/dp-pd/tbt-tt/Ap-eng.cfm?LANG=E&APATH=3&DETAIL=0&DIM=0&FL=A&FREE=0&GC=0&GID=0&GK=0&GRP=1&PID=101998&PRID=0&PTYPE=101955&S=0&SHOWALL=0&SUB=0&Temporal=2011&THEME=88&VID=0&VNAMEE=&VNAMEF>
35. Engel LS, Chow W-H, Vaughan TL, Gammon MD, Risch HA, Stanford JL, Schoenberg JB, Mayne ST, Dubrow R, Rotterdam H, West AB, Blaser M, Blot WJ, Gail MH, Fraumeni JF Jr. Population attributable risks of esophageal and gastric cancers. *J Natl Cancer Inst* [Internet]. 2003 Sep 17 [cited 2016 Oct 12];95(18):1404–13. Available from: <http://www.ncbi.nlm.nih.gov/pubmed/13130116>
36. Razak F, Anand SS, Shannon H, Vuksan V, Davis B, Jacobs R, Teo KK, McQueen M, Yusuf S. Defining Obesity Cut Points in a Multiethnic Population. *Circulation* [Internet]. 2007 Apr 23;115(16):2111 LP-2118. Available from: <http://circ.ahajournals.org/content/115/16/2111.abstract>
37. Gray LJ, Yates T, Davies MJ, Brady E, Webb DR, Sattar N, Khunti K. Defining Obesity Cut-Off Points for Migrant South Asians. Herder C, editor. *PLoS One* [Internet]. San Francisco, USA: Public Library of Science; 2011 Oct 19;6(10):e26464. Available from: <http://www.ncbi.nlm.nih.gov/pmc/articles/PMC3198431/>
38. Bain E, Crane M, Tieu J, Han S, Crowther CA, Middleton P. Diet and exercise interventions for preventing gestational diabetes mellitus. *Cochrane database Syst Rev*

- 1  
2  
3 [Internet]. 2015 [cited 2016 Oct 12];(4):CD010443. Available from:  
4  
5 <http://www.ncbi.nlm.nih.gov/pubmed/25864059>  
6  
7
- 8 39. Vaag A, Brøns C, Gillberg L, Hansen NS, Hjort L, Arora GP, Thomas N, Broholm C,  
9  
10 Ribel-Madsen R, Grunnet LG. Genetic, nongenetic and epigenetic risk determinants in  
11  
12 developmental programming of type 2 diabetes. *Acta Obstet Gynecol Scand* [Internet].  
13  
14 2014 Nov [cited 2016 Oct 12];93(11):1099–108. Available from:  
15  
16 <http://doi.wiley.com/10.1111/aogs.12494>  
17  
18
- 19 40. Hattersley AT, Tooke JE. The fetal insulin hypothesis: an alternative explanation of the  
20  
21 association of low birthweight with diabetes and vascular disease. *Lancet* [Internet]. 1999  
22  
23 May 22 [cited 2016 Oct 12];353(9166):1789–92. Available from:  
24  
25 <http://www.sciencedirect.com/science/article/pii/S0140673698075461>  
26  
27
- 28 41. Gilbert ER, Liu D. Epigenetics: The missing link to understanding  $\beta$ -cell dysfunction in  
29  
30 the pathogenesis of type 2 diabetes. *Epigenetics*. Landes Bioscience; 2012 Aug;7(8):841–  
31  
32 52.  
33  
34  
35  
36  
37  
38  
39  
40  
41  
42  
43  
44  
45  
46  
47  
48  
49  
50  
51  
52  
53  
54  
55  
56  
57  
58  
59  
60

Table 1: Maternal Characteristics in women with and without GDM

|                                            | GDM*          | Non GDM       | P-value |
|--------------------------------------------|---------------|---------------|---------|
| N                                          | 365           | 641           |         |
| Maternal Age (years)                       | 31.2 (4.0)    | 29.7 (3.8)    | <.0001  |
| Years in Canada (years)                    | 8.8 (7.5)     | 8.2 (7.9)     | 0.22    |
| Gestational age at study enrolment (weeks) | 26.8 (2.1)    | 26.6 (1.6)    | 0.10    |
| Parity:                                    |               |               | <0.001  |
| Primiparous (%)                            | 123 (34.3%)   | 283 (45.2%)   |         |
| Multiparous (%)                            | 236 (65.7%)   | 343 (54.8%)   |         |
| Smoked during Pregnancy (%)                | 0 (0.0%)      | 2 (0.3%)      | 0.54    |
| Vegetarian (%)                             | 125 (34.5%)   | 243 (38.1%)   | 0.25    |
| Diet Quality score                         | 2.2 (1.4)     | 2.5 (1.3)     | 0.002   |
| Low Diet Quality (%)                       | 121 (33.4%)   | 145 (22.9%)   | <0.001  |
| Hours of active sport/week (hours)         | 1.4 (2.2)     | 1.6 (2.5)     | 0.38    |
| Physical Activity in Pregnancy:            |               |               | 0.18    |
| Sedentary (%)                              | 97 (26.7%)    | 139 (21.7%)   |         |
| Mild Exercise (%)                          | 202 (55.6%)   | 373 (58.3%)   |         |
| Moderate Exercise (%)                      | 64 (17.6%)    | 128 (20.0%)   |         |
| Family history of Diabetes (%)             | 191 (52.5%)   | 228 (35.7%)   | <.0001  |
| Social Disadvantage Index:                 |               |               | 0.88    |
| High (%)                                   | 47 (15.2%)    | 90 (16.2%)    |         |
| Moderate (%)                               | 118 (38.1%)   | 213 (38.4%)   |         |
| Low (%)                                    | 145 (46.8%)   | 251 (45.3%)   |         |
| Currently Employed (%)                     | 196 (54.0%)   | 349 (54.5%)   | 0.87    |
| Annual household income =>50K (%)          | 143 (46.0%)   | 242 (43.6%)   | 0.50    |
| High school education (%)                  | 361 (99.4%)   | 638 (99.5%)   | 0.86    |
| Pre-pregnancy weight (kg)                  | 64.9 (12.2)   | 61.3 (11.8)   | <.0001  |
| Height (cm)                                | 161.6 (6.2)   | 162.5 (6.3)   | 0.02    |
| Pre-pregnancy BMI (kg/m <sup>2</sup> )     | 24.9 (4.6)    | 23.2 (4.3)    | <.0001  |
| Sum of skinfolds at enrolment (mm)         | 52.3 (12.3)   | 47.9 (12.4)   | <.0001  |
| Tricep skinfolds at enrolment (mm)         | 28.5 (6.7)    | 26.5 (6.8)    | <.0001  |
| Subscapular skinfolds at enrolment (mm)    | 24.1 (6.6)    | 21.5 (6.5)    | <.0001  |
| Area under the curve glucose (mmol.min)    | 966.8 (164.0) | 722.4 (102.5) | <.0001  |

1  
2  
3  
4  
5  
6  
7  
8  
9  
10  
11  
12  
13  
14  
15  
16  
17  
18  
19  
20  
21  
22  
23  
24  
25  
26  
27  
28  
29  
30  
31  
32  
33  
34  
35  
36  
37  
38  
39  
40  
41  
42  
43  
44  
45  
46  
47  
48  
49  
50  
51  
52  
53  
54  
55  
56  
57  
58  
59  
60

|                              |             |             |        |
|------------------------------|-------------|-------------|--------|
| Gestational weight gain (kg) | 13.5 (7.5)  | 14.7 (7.9)  | 0.02   |
| GWG/Pre-pregnancy weight     | 0.22 (0.13) | 0.25 (0.15) | <0.001 |
| C-Section (%)                | 127 (35.2%) | 177 (27.9%) | 0.02   |

\*GDM by Born in Bradford definition. Mothers with history of DM excluded.

Legend: BMI: Body Mass Index, GWG: Gestational Weight Gain

Confidential



Table 2: Newborn Characteristics by Maternal GDM Status

|                                      | GDM*        | Non-GDM     | P-value |
|--------------------------------------|-------------|-------------|---------|
| N                                    | 359         | 630         |         |
| Male (%)                             | 188 (52.4%) | 304 (48.3%) |         |
| Gestational age at birth (weeks, SD) | 38.8 (1.6)  | 39.3 (1.4)  |         |
| Size for gestational age             |             |             | 0.02    |
| LGA (%)                              | 48 (13.8%)  | 55 (9.0%)   |         |
| AGA (%)                              | 277 (79.4%) | 493 (80.6%) |         |
| SGA (%)                              | 24 (6.9%)   | 64 (10.5%)  |         |
| Birth weight (g)                     | 3267 (23)   | 3181 (17)   | 0.005   |
| Length (cm)                          | 51.0 (0.1)  | 51.1 (0.1)  | 0.68    |
| Waist circumference (cm)             | 30.8 (0.1)  | 30.3 (0.1)  | 0.009   |
| Head circumference (cm)              | 34.1 (0.1)  | 34.0 (0.1)  | 0.43    |
| Sum of skinfolds (mm)                | 11.7 (0.1)  | 11.2 (0.1)  | 0.007   |
| Tricep skinfolds (mm)                | 6.1 (0.1)   | 5.9 (0.1)   | 0.05    |
| Subscapular skinfolds (mm)           | 5.5 (0.1)   | 5.2 (0.1)   | 0.002   |
| Ponderal index (kg/m <sup>3</sup> )  | 24.8 (0.2)  | 24.0 (0.1)  | 0.002   |
| Placental weight (g)                 | 503.2 (8.1) | 474.9 (5.8) | 0.007   |
| Cord blood glucose (mmol/L)          | 4.1 (0.1)   | 4.1 (0.0)   | 0.88    |
| Cord blood insulin (pmol/L)          | 76.3 (3.8)  | 61.6 (2.8)  | 0.002   |
| Glucose/insulin ratio *(mmol/cIU)    | 6.42 (0.60) | 8.96 (0.45) | 0.001   |

Means (SE) adjusted for newborn gestational age, sex, and insulin use by mothers.

Size for gestational age as determined by gestational age and sex specific percentiles from study data.

Ponderal index defined as birth weight (kg)/birth length (m<sup>3</sup>)

\* Non log insulin used

Table 3: Population Attributable Risk and GDM

|                                  | Odds (95% CI)<br>from<br>Multivariable<br>Model | Prevalence | PAR % (95% CI) <sup>1</sup> |
|----------------------------------|-------------------------------------------------|------------|-----------------------------|
| Age 32-43 vs <29                 | 2.10 (1.51, 2.91)                               | 36.4%      | 24.5 (15.2, 33.7)           |
| Age 29-31 vs <29                 | 1.34 (0.94, 1.90)                               | 28.6%      | 7.0 (-1.1, 15.0)            |
| Family hx of DM<br>(1/0)         | 1.70 (1.29, 2.23)                               | 42.1%      | 21.6 (11.4, 31.8)           |
| Low Diet Quality<br>(1/0)        | 1.62 (1.20, 2.19)                               | 26.7%      | 12.8 (5.2, 20.4)            |
| BMI>23 vs lower                  | 1.80 (1.37, 2.37)                               | 51.5%      | 28.1 (16.6, 39.5)           |
| Low Diet Quality<br>&/or BMI >23 |                                                 | 63.5%      | 37.3 (25.9, 48.7)           |
| All factors                      |                                                 |            | 65.3 (55.6, 75.1)           |

<sup>1</sup>IRAP method: PAR estimates and 95% CIs were calculated by the interactive risk-attributable program software (US National Cancer Institute, 2002) (35); Continuous factors needed to be categorized: Age was divided into tertiles; BMI was split into 3 BMI categories (<18.5, 18.5-23, >23) and highest BMI (>23) was selected as it was significantly different from lower categories.

Table 4: Low quality versus High Quality Diet Foods among South Asians in Pregnancy

| Foods which were consumed in greater quantity among those classified as Low Quality Diet | Foods which were consumed in greater quantity in those classified as High Quality Diet |
|------------------------------------------------------------------------------------------|----------------------------------------------------------------------------------------|
| Meat, Meat Dishes, Processed Meats, Organ Meats, Poultry                                 | Vegetable- Raw and Cooked                                                              |
| Fish and Seafood                                                                         | Legumes -Daals                                                                         |
| Rice                                                                                     | Nuts and Seeds                                                                         |
| Fried Foods                                                                              | Low fat Dairy (Low fat and fermented)                                                  |
| Refined Grains- breads and cereals                                                       | Whole Grains - Breads and cereals                                                      |
| Fast Foods                                                                               | Sweets                                                                                 |
| Eggs                                                                                     | Fruits                                                                                 |

Confidential

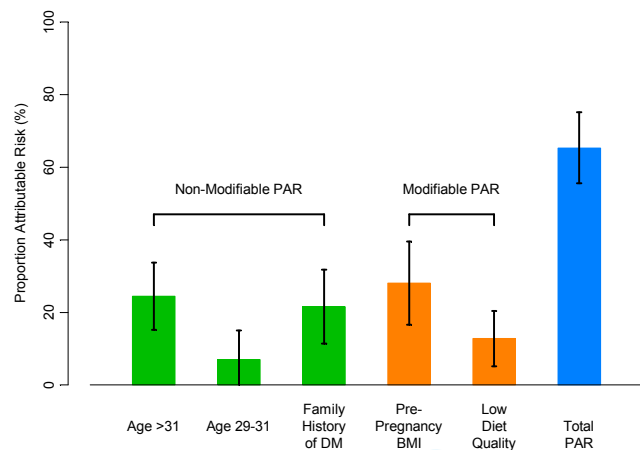

Figure 1 shows the partial proportional attributable risk (PAR) and 95% CI of individual risk factors for South Asian mothers developing GDM. Non-modifiable factors are shown in green; modifiable factors in orange; and the full PAR is shown in blue. PAR estimates and 95% CIs were calculated by the interactive risk-attributable program software (US National Cancer Institute, 2002) (34).

Note to Editor: The information regarding the participants from the cohort included in this analysis may be interest to authors codetermine how subjects were ascertained.

Suppl Figure 1: Study Population

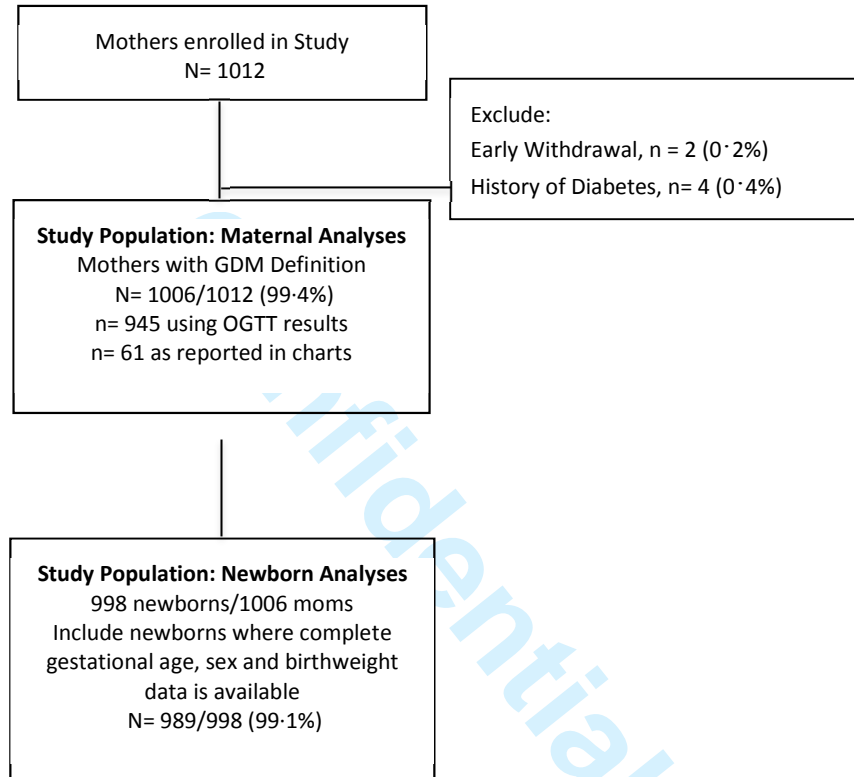

Supplement: supp_5.3.E604_2017-0027_original_submission.pdf [file supp_5.3.E604_2017-0027_original_submission.pdf]
