# Supplementary material
Source: PubMed Central journal article supplement (PMC5621966)

**Appendix 1 (as supplied by the authors):** Supplementary Figure 1: Study Population

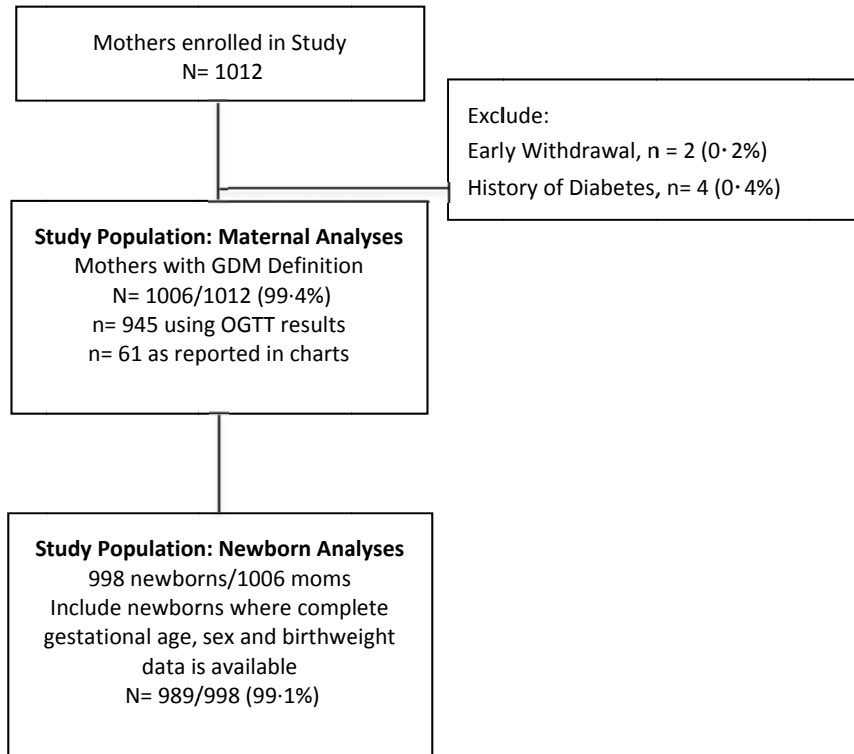

Supplement: supp_5.3.E604_2017-0027-1-at.pdf [file supp_5.3.E604_2017-0027-1-at.pdf]
